# Supplementary material for: Electrical decoupling of microbial electrochemical reactions enables spontaneous H2 evolution
Source: Royal Society of Chemistry journal article supplement (doi:10.1039/c9ee02571e), 2019-11-05
Supplement: c9ee02571e2.pdf [file c9ee02571e2.pdf]

## Supporting Information

### **Electrical decoupling of microbial electrochemical reactions enables spontaneous H<sub>2</sub> evolution**

**Xi Chen<sup>1</sup>, Fernanda Leite Lobo<sup>2</sup>, Yanhong Bian,<sup>1</sup> Lu Lu<sup>1</sup>, Xiaowen Chen<sup>3</sup>,  
Melvin P. Tucker<sup>3</sup>, Yuxi Wang<sup>4</sup>, Zhiyong Jason Ren <sup>1\*</sup>**

<sup>1</sup> Department of Civil and Environmental Engineering and Andlinger Center for Energy and the Environment, Princeton University, Princeton, NJ 08544, United States

<sup>2</sup> Departamento de Engenharia Hidráulica e Ambiental, Universidade Federal do Ceará, Brazil

<sup>3</sup> National Bioenergy Center, National Renewable Energy Laboratory, 15013 Denver West Parkway, Golden, United States

<sup>4</sup> The Earth Institute and School of International and Public Affairs, Columbia University, New York, NY 10027, United States

\*Correspondence: [zjren@princeton.edu](mailto:zjren@princeton.edu)

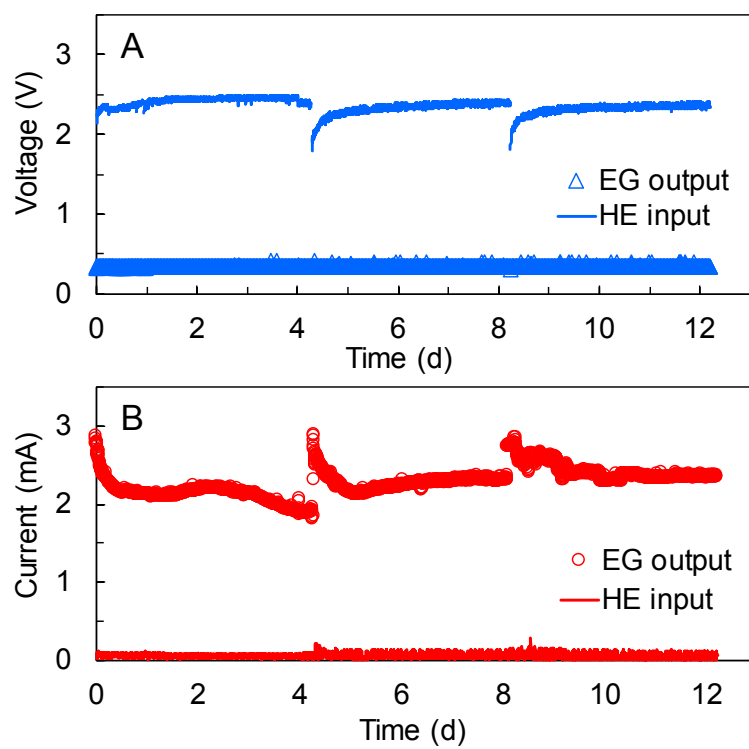

**Figure S1** Time-course voltage (A) and current (B) of the energy generation part output (EG output) and hydrogen evolution input (HE input) during multiple cycles of operation.

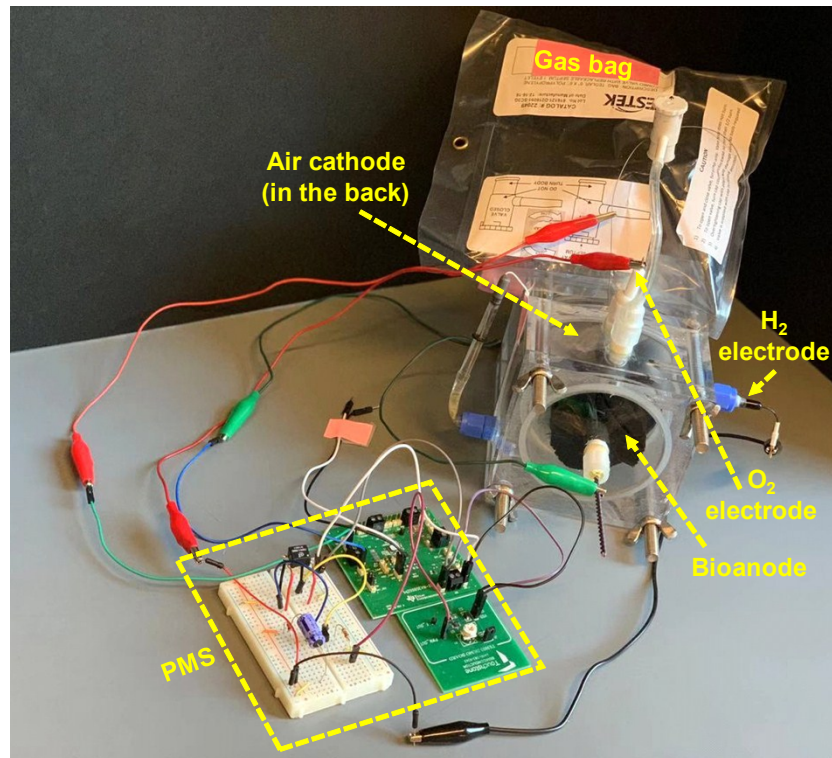

**Figure S2** Picture of the system. PMS: power management system.
